# Supplementary material for: Consumption in out-of-hours health care: Danes double Dutch?
Source: PubMed Central journal article supplement (PMC4137903; doi:10.3109/02813432.2014.898974), 2014-03
Supplement: pri-32-44-s001.pdf [file pri-32-44-s001.pdf]

*Supplementary material for* Huibers L, et al. Consumption in out-of-hours health care: Danes double Dutch? *Scand J Prim Health Care* 2014;32:44–50.

Supplementary Appendix 1. Description of the OOH care settings in the Danish and Dutch regions.

|                               | Danish region                                                                                                                                                                                                                                                                                                                                                                                                                                                          | Dutch region                                                                                                                                                                                                                                                                                                                                                                                                                                                                                                                                             |
|-------------------------------|------------------------------------------------------------------------------------------------------------------------------------------------------------------------------------------------------------------------------------------------------------------------------------------------------------------------------------------------------------------------------------------------------------------------------------------------------------------------|----------------------------------------------------------------------------------------------------------------------------------------------------------------------------------------------------------------------------------------------------------------------------------------------------------------------------------------------------------------------------------------------------------------------------------------------------------------------------------------------------------------------------------------------------------|
| Characteristics of region     |                                                                                                                                                                                                                                                                                                                                                                                                                                                                        |                                                                                                                                                                                                                                                                                                                                                                                                                                                                                                                                                          |
| Size                          | 13 124 km <sup>2</sup> (≈30% of Denmark) and ≈1 265 601 inhabitants                                                                                                                                                                                                                                                                                                                                                                                                    | Estimate 842 km <sup>2</sup> and ≈430 498 inhabitants                                                                                                                                                                                                                                                                                                                                                                                                                                                                                                    |
| Urban and rural               | One big city, smaller cities, and small villages                                                                                                                                                                                                                                                                                                                                                                                                                       | One big city, smaller cities, and small villages                                                                                                                                                                                                                                                                                                                                                                                                                                                                                                         |
| Existing health care services |                                                                                                                                                                                                                                                                                                                                                                                                                                                                        |                                                                                                                                                                                                                                                                                                                                                                                                                                                                                                                                                          |
| Primary care <sup>1,2</sup>   | <p>Organization: large OOH primary care setting</p> <p>Opening hours: between 4 p.m. and 8 a.m. on weekdays, during weekends, and during holidays</p> <p>Access: a telephone contact is mandatory to get a consultation</p> <p>Telephone triage: by GPs</p> <p>Locations: 13 consultation centres (nine permanent consultation centres located at hospitals and four flexible consultation rooms)</p> <p>Other: on two small islands, local GPs provide acute care</p> | <p>Organization: large OOH primary care setting, collocated with an ED</p> <p>Opening hours: between 5 p.m. and 8 a.m., during weekends, and during holidays</p> <p>Access: in principal a telephone call is mandatory, but patients can walk in; also walk-in ED patients are redirected to primary care</p> <p>Telephone triage: physician assistants and nurses supervised by a telephone GP</p> <p>Locations: one main consultation centre, including call centre and a second consultation centre</p>                                               |
| ED <sup>1,3,4</sup>           | <p>Locations: 11 EDs/acute clinics (five in western part; six in eastern part)</p> <p>Access: in principle patients have to call first (in the western part the general practice; in the eastern part a special telephone number).</p>                                                                                                                                                                                                                                 | <p>Locations: three EDs (two general hospital and one academic hospital); two are collocated with the primary care setting, sharing one entrance</p> <p>Access: in principle persons have to call first</p>                                                                                                                                                                                                                                                                                                                                              |
| Ambulance /112 <sup>1,5</sup> | <p>Organization: ambulance service and communication centre for ambulance care</p> <p>Access: national 112 centre refers medical calls to regional emergency medical communication centre (EMCC)</p> <p>Telephone triage: nurses/ambulance professionals answer calls, estimating urgency and health care required. GPs and hospitals contact the EMCC directly, bypassing the 112 system</p>                                                                          | <p>Organization: ambulance service and communication centre for ambulance care (communication centre shared with fire department and police)</p> <p>Access: national 112 centre refers medical calls to regional emergency medical communication centre</p> <p>Telephone triage: nurses answer calls, estimating urgency and health care required, and coordinate ambulance transport</p> <p>Addition: nurses handle calls for other health care professionals OOH (e.g. community health services, forensic physicians, maternity care, youth care)</p> |

Notes: ED = emergency department; OOH = out-of-hours.

Supplementary Appendix 2. Regional contacts with health care in September and October 2011.

| Service                                | Danish region<br>(n≈1 265 601 inhabitants) |                 | Dutch region<br>(n≈430 498 inhabitants) |                  |
|----------------------------------------|--------------------------------------------|-----------------|-----------------------------------------|------------------|
|                                        | n (%)                                      | n/1000/2 months | n (%)                                   | n/1000/2 months  |
| GP daytime                             | 1 450 576                                  | 1146            |                                         | 717 <sup>1</sup> |
| GP out-of-hours care                   | 101 429                                    | 80              | 21 410                                  | 50               |
| Telephone consultation                 | 59 378 (58.6)                              | 47              | 8619 (40.3)                             | 20               |
| Clinic consultation                    | 28 790 (28.4)                              | 23              | 10 611 (49.6) <sup>2</sup>              | 25               |
| Home visit                             | 13,261 (13.1)                              | 10              | 2180 (10.2)                             | 5                |
| Emergency department                   | 31 536                                     | 25              | 3164 + 4376 <sup>3</sup>                | 5–10 + 10–14     |
| Ambulance dispatch centre <sup>4</sup> | 24 803 <sup>5</sup>                        | 20–21           | 3152 <sup>6</sup>                       | 10–20            |

Notes: \*In both countries, the numbers presented include some duplicates, due to repetitive contacts by patients or referrals by GPs. <sup>1</sup>National LINH (Netherlands Information Network of General Practice) figure adjusted to represent a two-month period; <sup>2</sup>Walk-in patients visit primary care first, due to collocation with ED and shared entrance; <sup>3</sup>Academic + regional hospital; including range for variation in catchment area; <sup>4</sup>Presenting range, with and without patient telephone calls without dispatch (category E); 6% in Denmark and estimated as up to 50% in the Netherlands; <sup>5</sup>Prospective data collection at ambulance dispatch centre; <sup>6</sup>Ambulance region with number of inhabitants adjusted to safety region.
